# Supplementary material for: Risk and protective factors for atrial fibrillation after cardiac surgery and valvular interventions: an umbrella review of meta-analyses
Source: HighWire-hosted journal article supplement (doi:10.1136/openhrt-2022-002074), 2022-09-01
Supplement: openhrt-2022-002074supp001_data_supplement.pdf [file openhrt-2022-002074supp001_data_supplement.pdf]

## Supplementary content

### Table of Contents

|                                                                                                              |    |
|--------------------------------------------------------------------------------------------------------------|----|
| <b>Appendix 2</b> Search Strategy .....                                                                      | 2  |
| <b>Appendix 3</b> List of studies excluded after full-text evaluation with reasoning .....                   | 3  |
| <b>Appendix 4</b> Criteria for evaluation of the credibility of evidence.....                                | 6  |
| <b>Appendix 5</b> List of studies included in the umbrella meta-analysis with baseline characteristics ..... | 7  |
| <b>Appendix 6</b> Non-significant risk/protective factors for postoperative AF, in meta-analyses of RCTs..   | 15 |
| References.....                                                                                              | 17 |

## Appendix 2 Search Strategy

### Pubmed

(auricular fibrillation OR atrial fibrillation OR AF OR AFib) AND (“meta-analysis as topic”[MeSH:noexp] OR Meta-Analysis[ptyp] OR metaanaly\*[tiab] OR meta-analy\*[tiab])

### Web of science

(TS=(atrial fibrillation AND TS= (meta-analysis OR metaanaly\* OR meta-analy\*)) AND LANGUAGE: (English) AND DOCUMENT TYPES: (Article)

### Cochrane review

### Keyword:

Atrial fibrillation

### Embase (Cochrane central database of triasls (373)

(auricular fibrillation OR atrial fibrillation) AND (meta-analysis OR metaanaly\* OR meta-analy\*)

### Appendix 3 List of studies excluded after full-text evaluation with reasoning

*eTable 1* List of studies excluded after full-text evaluation with reasoning

| <b>Author, Year</b>              | <b>Reason for exclusion</b>                                                                      |
|----------------------------------|--------------------------------------------------------------------------------------------------|
| Zhang, 2016 <sup>1</sup>         | Different estimate measures                                                                      |
| Disertori, 2012 <sup>2</sup>     | Another outcome                                                                                  |
| Schneider, 2010 <sup>3</sup>     | Another outcome                                                                                  |
| Bhuriya, 2011 <sup>4</sup>       | Another outcome                                                                                  |
| White, 2007 <sup>5</sup>         | Systematic review (no meta-analysis)                                                             |
| Samokhvalov, 2010 <sup>6</sup>   | Another outcome                                                                                  |
| Kodama, 2011 <sup>7</sup>        | Another outcome                                                                                  |
| Shiga, 2004 <sup>8</sup>         | Another meta-analysis with larger number of studies with same risk or protective factor          |
| Alghamdi, 2005 <sup>9</sup>      | Another meta-analysis with larger number of studies for the same risk or protective factor of AF |
| Mak, 2009 <sup>10</sup>          | Another outcome                                                                                  |
| Leong, 2016 <sup>11</sup>        | Another outcome                                                                                  |
| Tanboga, 2016 <sup>12</sup>      | Another outcome                                                                                  |
| Liu, 2016 <sup>13</sup>          | Another outcome                                                                                  |
| Shepherd, 2008 <sup>14</sup>     | Systematic review (no meta-analysis)                                                             |
| Nomani, 2020 <sup>15</sup>       | Systematic review (no meta-analysis)                                                             |
| Kontogiorgis, 2016 <sup>16</sup> | Systematic review (no meta-analysis)                                                             |
| Madrid, 2004 <sup>17</sup>       | Another outcome                                                                                  |
| Yang, 2014 <sup>18</sup>         | Another outcome                                                                                  |
| Patel, 2007 <sup>19</sup>        | Another meta-analysis with larger number of studies for the same risk or protective factor of AF |
| Zhou, 2013 <sup>20</sup>         | Another outcome                                                                                  |
| Kulik, 2009 <sup>21</sup>        | Systematic review (no meta-analysis)                                                             |
| Winchester, 2010 <sup>22</sup>   | Another meta-analysis with larger number of studies for the same risk or protective factor of AF |
| Dong, 2011 <sup>23</sup>         | Another meta-analysis with larger number of studies for the same risk or protective factor of AF |
| Liakopoulos, 2012 <sup>24</sup>  | Another meta-analysis with larger number of studies for the same risk or protective factor of AF |
| Chen, 2010 <sup>25</sup>         | Another meta-analysis with larger number of studies for the same risk or protective factor of AF |
| Liakopoulos, 2008 <sup>26</sup>  | Another meta-analysis with larger number of studies for the same risk or protective factor of AF |
| Elgendy, 2015 <sup>27</sup>      | Another meta-analysis with larger number of studies for the same risk or protective factor of AF |
| Goh, 2015 <sup>28</sup>          | Systematic review (no meta-analysis)                                                             |
| Rezaei, 2016 <sup>29</sup>       | Another meta-analysis with larger number of studies for the same risk or protective factor of AF |
| An, 2017 <sup>30</sup>           | Another meta-analysis with larger number of studies for the same risk or protective factor of AF |

|                                       |                                                                                                  |
|---------------------------------------|--------------------------------------------------------------------------------------------------|
| Yuan, 2017 <sup>31</sup>              | Another meta-analysis with larger number of studies for the same risk or protective factor of AF |
| Zhen-Han, 2017 <sup>32</sup>          | Another meta-analysis with larger number of studies for the same risk or protective factor of AF |
| Ma, 2018 <sup>33</sup>                | Another meta-analysis with larger number of studies for the same risk or protective factor of AF |
| Zhang, 2019 <sup>34</sup>             | Another meta-analysis with larger number of studies for the same risk or protective factor of AF |
| Zhang, 2011 <sup>35</sup>             | Different estimate measures                                                                      |
| Baker, 2007 <sup>36</sup>             | Another meta-analysis with larger number of studies for the same risk or protective factor of AF |
| Whitlock, 2020 <sup>37</sup>          | Another meta-analysis with larger number of studies for the same risk or protective factor of AF |
| Baker, 2016 <sup>38</sup>             | Another meta-analysis with larger number of studies for the same risk or protective factor of AF |
| Hill, 2019 <sup>39</sup>              | Another meta-analysis with larger number of studies for the same risk or protective factor of AF |
| Polymeropoulos, 2016 <sup>40</sup>    | Systematic review (no meta-analysis)                                                             |
| Shi, 2018 <sup>41</sup>               | Another meta-analysis with larger number of studies for the same risk or protective factor of AF |
| Bagshaw, 2006 <sup>42</sup>           | Another meta-analysis with larger number of studies for the same risk or protective factor of AF |
| Buckley, 2007 <sup>43</sup>           | Another meta-analysis with larger number of studies for the same risk or protective factor of AF |
| Sakamoto, 2014 <sup>44</sup>          | Another meta-analysis with larger number of studies for the same risk or protective factor of AF |
| Ji, 2016 <sup>45</sup>                | Another meta-analysis with larger number of studies for the same risk or protective factor of AF |
| Kim 2021 <sup>46</sup>                | Overlapping meta-analysis of risk or protective factors of AF                                    |
| Thein, 2018 <sup>47</sup>             | Overlapping meta-analysis of risk or protective factors of AF                                    |
| Weymann, 2017 <sup>48</sup>           | Different estimate measures                                                                      |
| Kuhn, 2015 <sup>49</sup>              | Another meta-analysis with larger number of studies for the same risk or protective factor of AF |
| Cheng, 2005 <sup>50</sup>             | Another meta-analysis with larger number of studies for the same risk or protective factor of AF |
| Wijeyesundera, 2005 <sup>51</sup>     | Another meta-analysis with larger number of studies for the same risk or protective factor of AF |
| Zimmer, 2003 <sup>52</sup>            | Another meta-analysis with larger number of studies for the same risk or protective factor of AF |
| Sedrakyan, 2005 <sup>53</sup>         | Another meta-analysis with larger number of studies for the same risk or protective factor of AF |
| Trivedi, 2017 <sup>54</sup>           | Another meta-analysis with larger number of studies for the same risk or protective factor of AF |
| Khan, 2013 <sup>55</sup>              | Another meta-analysis with larger number of studies for the same risk or protective factor of AF |
| Harling, 2011 <sup>56</sup>           | Another meta-analysis with larger number of studies for the same risk or protective factor of AF |
| Ali-Hassan-Sayegh, 2014 <sup>57</sup> | Another meta-analysis with larger number of studies for the same risk or protective factor of AF |

|                                        |                                                                                                  |
|----------------------------------------|--------------------------------------------------------------------------------------------------|
| Lee, 2016 <sup>58</sup>                | Another meta-analysis with larger number of studies for the same risk or protective factor of AF |
| Salih, 2017 <sup>59</sup>              | Different estimate measures                                                                      |
| Harrison, 2013 <sup>60</sup>           | Another outcome                                                                                  |
| De Oliveira, 2012 <sup>61</sup>        | Another meta-analysis with larger number of studies for the same risk or protective factor of AF |
| Fairley, 2017 <sup>62</sup>            | Another meta-analysis with larger number of studies for the same risk or protective factor of AF |
| Athanasίου, 2004 <sup>63</sup>         | Another meta-analysis with larger number of studies for the same risk or protective factor of AF |
| Armaganijan, 2011 <sup>64</sup>        | Another meta-analysis with larger number of studies for the same risk or protective factor of AF |
| Benedetto, 2013 <sup>65</sup>          | Another meta-analysis with larger number of studies for the same risk or protective factor of AF |
| Costanzo, 2013 <sup>66</sup>           | Another meta-analysis with larger number of studies for the same risk or protective factor of AF |
| Mozaffarian, 2013 <sup>67</sup>        | Another meta-analysis with larger number of studies for the same risk or protective factor of AF |
| Xin, 2013 <sup>68</sup>                | Another meta-analysis with larger number of studies for the same risk or protective factor of AF |
| Zhang, 2014 <sup>69</sup>              | Different estimate measures                                                                      |
| Wu, 2018 <sup>70</sup>                 | Other design                                                                                     |
| De Frutos, 2014 <sup>71</sup>          | Different estimate measures                                                                      |
| Cappabianca, 2011 <sup>72</sup>        | Another meta-analysis with larger number of studies for the same risk or protective factor of AF |
| Viviano, 2014 <sup>73</sup>            | Another meta-analysis with larger number of studies for the same risk or protective factor of AF |
| Hu, 2017 <sup>74</sup>                 | Another meta-analysis with larger number of studies for the same risk or protective factor of AF |
| Burgess, 2006 <sup>75</sup>            | Another meta-analysis with larger number of studies for the same risk or protective factor of AF |
| Lowres, 2018 <sup>76</sup>             | Another outcome                                                                                  |
| Öztürk, 2020 <sup>77</sup>             | Different estimate measures                                                                      |
| Walter, 2020 <sup>78</sup>             | Another meta-analysis with larger number of studies for the same risk or protective factor of AF |
| Bjerrum, 2020 <sup>79</sup>            | Systematic review (no meta-analysis)                                                             |
| Chokesuwattanaskul, 2020 <sup>80</sup> | Systematic review (no meta-analysis)                                                             |
| Norhayati, 2020 <sup>81</sup>          | Another meta-analysis with larger number of studies for the same risk or protective factor of AF |

## Appendix 4 Criteria for evaluation of the credibility of evidence

eTable 1. Criteria for evaluation of the credibility of the evidence of observational studies

| Classification                        | Criteria                                                                                                                                                                                                                                                                                                                                                                                                                                                                                                           |
|---------------------------------------|--------------------------------------------------------------------------------------------------------------------------------------------------------------------------------------------------------------------------------------------------------------------------------------------------------------------------------------------------------------------------------------------------------------------------------------------------------------------------------------------------------------------|
| Convincing evidence (Class I)         | <ol style="list-style-type: none"> <li>1. More than 1000 cases</li> <li>2. Significant summary associations (<math>p &lt; 1 \times 10^{-6}</math>) per random-effects calculations</li> <li>3. No evidence of small-study effects</li> <li>4. No evidence of excess of significance bias</li> <li>5. Prediction intervals not including the null value</li> <li>6. Largest study nominally significant (<math>p &lt; 0.05</math>)</li> <li>7. No large heterogeneity (i.e., <math>I^2 &lt; 50\%</math>)</li> </ol> |
| Highly Suggestive evidence (Class II) | <ol style="list-style-type: none"> <li>1. More than 1000 cases</li> <li>2. Significant summary associations (<math>p &lt; 1 \times 10^{-6}</math>) per random-effects calculation</li> <li>3. Largest study nominally significant (<math>p &lt; 0.05</math>)</li> </ol>                                                                                                                                                                                                                                            |
| Suggestive Evidence (Class III)       | <ol style="list-style-type: none"> <li>1. More than 1000 cases</li> <li>2. Significant summary associations (<math>p &lt; 1 \times 10^{-3}</math>) per random-effects calculations</li> </ol>                                                                                                                                                                                                                                                                                                                      |
| Weak evidence (Class IV)              | <ol style="list-style-type: none"> <li>1. All other associations with <math>p \leq 0.05</math></li> </ol>                                                                                                                                                                                                                                                                                                                                                                                                          |
| Non-significant associations (NS)     | <ol style="list-style-type: none"> <li>1. All associations with <math>p &gt; 0.05</math></li> </ol>                                                                                                                                                                                                                                                                                                                                                                                                                |

eTable 2. Criteria for evaluation of the credibility of the evidence of RCTs

| Grade level of evidence | Number of downgrades |
|-------------------------|----------------------|
| High                    | 0 downgrades         |
| Moderate                | 1 -2 downgrades      |
| Low                     | 3-4 downgrades       |
| Very Low                | 5-6 downgrades       |

Note: GRADE: Grading of Recommendations Assessment, Development and Evaluation.

## Appendix 5 List of studies included in the umbrella meta-analysis with baseline characteristics

*eTable 1 List of studies included in the umbrella meta-analysis with baseline characteristics*

| Study                      | Type of studies included | Risk or protective factors of recurrence post cardiac surgery or intervention | Exposures                                        | Non-exposures (comparator) | No of included studies estimates | Population (s)                             | AMSTAR 2               |
|----------------------------|--------------------------|-------------------------------------------------------------------------------|--------------------------------------------------|----------------------------|----------------------------------|--------------------------------------------|------------------------|
| Liu, 2019 <sup>82</sup>    | RCTs                     | Dexmedetomidine                                                               | Dexmedetomidine use                              | No use                     | 13                               | Patients undergoing cardiac surgery        | High quality           |
| Miller, 2005 <sup>83</sup> | RCTs                     | Magnesium                                                                     | Low/high Magnesium dose administration           | No administration          | 20                               | Patients undergoing cardiac surgery        | Critically low quality |
| Henyan, 2005 <sup>84</sup> | RCTs                     | Magnesium                                                                     | Pre/intra/postoperative magnesium administration | No administration          | 5                                | Patients undergoing cardiothoracic surgery | Critically low quality |
| Guerra, 2017 <sup>85</sup> | RCTs                     | Ranolazine                                                                    | Ranolazine use                                   | No use                     | 5                                | Patients undergoing cardiac surgery        | High quality           |
| Patti, 2015 <sup>86</sup>  | RCTs                     | Statin pre-treatment                                                          | Statin use                                       | No use                     | 11                               | Patients undergoing                        | High quality           |

|                             |      |                                                                    |                                                                           |        |    |                                                     |                        |
|-----------------------------|------|--------------------------------------------------------------------|---------------------------------------------------------------------------|--------|----|-----------------------------------------------------|------------------------|
|                             |      |                                                                    |                                                                           |        |    | cardiac surgery                                     |                        |
| Putzu, 2016 <sup>87</sup>   | RCTs | Perioperative statin treatment                                     | Statin use                                                                | No use | 19 | Patients undergoing cardiac surgery                 | High quality           |
| Mariani, 2013 <sup>88</sup> | RCTs | n-3 PUFAs                                                          | n-3 PUFA use                                                              | No use | 8  | Patients undergoing cardiac surgery                 | High quality           |
| Liu, 2011 <sup>89</sup>     | RCTs | Omega-3 fatty acids                                                | Omega-3 fatty acids use                                                   | No use | 10 | Patients undergoing cardiac surgery                 | Critically low quality |
| Guo, 2014 <sup>90</sup>     | RCTs | Omega-3 fatty acids combined with vitamin C and vitamin D          | Use of omega-3 fatty acids combined with vitamin C and vitamin D          | No use | 11 | Patients undergoing cardiac surgery                 | Moderate quality       |
| Gu, 2012 <sup>91</sup>      | RCTs | Thoracic epidural anaesthesia post coronary artery bypass grafting | Use of thoracic epidural anaesthesia post coronary artery bypass grafting | No use | 5  | Patients undergoing coronary artery bypass grafting | Critically low quality |
| Li, 2020 <sup>92</sup>      | RCTs | Perioperative Glucose-Insulin-Potassium                            | Perioperative Glucose-Insulin-Potassium use                               | No use | 13 | Patients undergoing cardiac surgery                 | Moderate quality       |



|                                       |      |                                     |                                                  |                |    |                                     |                        |
|---------------------------------------|------|-------------------------------------|--------------------------------------------------|----------------|----|-------------------------------------|------------------------|
| Gillespie, 2005 <sup>93</sup>         | RCTs | Postoperative amiodarone            | Postoperative Amiodarone use                     | No use         | 15 | Patients undergoing cardiac surgery | Moderate quality       |
| Chatterjee, 2013 <sup>94</sup>        | RCTs | Amiodarone                          | Oral, iv, pre- and peri-operative amiodarone use | No use         | 15 | Patients undergoing cardiac surgery | Low quality            |
| Ali-Hassan-Sayegh, 2015 <sup>95</sup> | RCTs | Glucose–insulin–potassium treatment | Glucose–insulin–potassium treatment              | No treatment   | 14 | Patients undergoing cardiac surgery | High quality           |
| Espinosa, 2016 <sup>96</sup>          | RCTs | Clevidipine                         | Clevidipine use                                  | No use         | 4  | Patients undergoing cardiac surgery | High quality           |
| Violi, 2014 <sup>97</sup>             | RCTs | Antioxidants use                    | Antioxidants use                                 | No use         | 15 | Patients undergoing cardiac surgery | Critically low quality |
| Ling, 2018 <sup>98</sup>              | RCTs | Dexmedetomidine                     | Dexmedetomidine use                              | No use         | 9  | Patients undergoing cardiac surgery | High quality           |
| DiNicolantonio, 2014 <sup>99</sup>    | RCTs | Carvedilol use                      | Carvedilol use                                   | Metoprolol use | 4  | Patients undergoing cardiac surgery | High quality           |
| Li, 2015 <sup>100</sup>               | RCTs | Landiolol                           | Landiolol use                                    | No use         | 9  | Patients undergoing                 | High quality           |

|                                 |                                            |                                |                                    |                      |    |                                             |                       |
|---------------------------------|--------------------------------------------|--------------------------------|------------------------------------|----------------------|----|---------------------------------------------|-----------------------|
|                                 |                                            |                                |                                    |                      |    | cardiac surgery                             |                       |
| Ho, 2009 <sup>101</sup>         | RCTs                                       | Corticosteroids                | Corticosteroids use                | No use               | 18 | Patients undergoing cardiac surgery         | High quality          |
| Athanasίου, 2004 <sup>102</sup> | Retrospective cohorts                      | Off-pump technic               | Off-pump technic                   | No Off-pump technic  | 8  | Elderly patients undergoing cardiac surgery | Critially low quality |
| Wiesbauer, 2007 <sup>103</sup>  | RCTs                                       | B-blockers                     | B-blocker use                      | No use               | 26 | Patients undergoing cardiac surgery         | Critially low quality |
| Litton, 2012 <sup>104</sup>     | Prospective cohorts, Retrospective cohorts | BNP or NT-proBNP               | High BNP/NT-proBNP                 | Low BNP/ NT-proBNP   | 4  | Patients undergoing cardiac surgery         | Critially low quality |
| Phan, 2016 <sup>105</sup>       | Prospective cohorts, Retrospective cohorts | Obesity                        | Obese                              | Non-obese            | 32 | Patients undergoing cardiac surgery         | High quality          |
| Liu, 2018 <sup>106</sup>        | Prospective cohort                         | blood transfusion              | blood transfusion                  | No blood transfusion | 8  | Patients undergoing cardiac surgery         | High quality          |
| Rabi, 2010 <sup>107</sup>       | RCTs                                       | Peri-operative GI/GIK infusion | Peri-operative GI/GIK infusion use | No use               | 12 | Patients undergoing                         | Critially low quality |

|                               |                     |                                                  |                                                  |                              |    |                                     |                        |
|-------------------------------|---------------------|--------------------------------------------------|--------------------------------------------------|------------------------------|----|-------------------------------------|------------------------|
|                               |                     |                                                  |                                                  |                              |    | cardiac surgery                     |                        |
| Liu, 2015 <sup>108</sup>      | RCTs                | Anterior fat pad removal                         | Anterior fat pad removal                         | Anterior fat pad left intact | 7  | Patients undergoing CABG            | Moderate quality       |
| Geng, 2017 <sup>109</sup>     | RCTs                | Perioperative antioxidant vitamin administration | Perioperative antioxidant vitamin administration | No administration            | 11 | Patients undergoing cardiac surgery | High quality           |
| Lennerz, 2017 <sup>110</sup>  | RCTs                | Colchicine                                       | Colchicine use                                   | No use                       | 5  | Patients undergoing cardiac surgery | Moderate quality       |
| Zhu, 2018 <sup>111</sup>      | RCTs                | Dexmetomidine                                    | Dexmetomidine use                                | No use                       | 5  | Patients undergoing cardiac surgery | High quality           |
| Kaw, 2016 <sup>112</sup>      | RCTs                | Diastolic dysfunction                            | Diastolic dysfunction                            | Normal diastolic function    | 3  | Patients undergoing cardiac surgery | Moderate quality       |
| Liu, 2014 <sup>113</sup>      | RCTs                | N-acetylcysteine                                 | N-acetylcysteine use                             | No use                       | 10 | Patients undergoing cardiac surgery | Critically low quality |
| Qaddoura, 2014 <sup>114</sup> | Prospective cohorts | OSAS                                             | OSAS                                             | No OSAS                      | 7  | Patients undergoing CABG            | Moderate quality       |

|                               |                                                              |                                     |                                                  |                                        |    |                                             |                  |
|-------------------------------|--------------------------------------------------------------|-------------------------------------|--------------------------------------------------|----------------------------------------|----|---------------------------------------------|------------------|
| Hu, 2016 <sup>115</sup>       | RCTs                                                         | posterior pericardiotomy            | posterior pericardiotomy                         | No posterior pericardiotomy            | 10 | Patients undergoing CABG                    | High quality     |
| Zhou, 2017 <sup>116</sup>     | Prospective cohort, Case-control                             | preoperative hypertension treatment | preoperative hypertension treatment              | No preoperative hypertension treatment | 25 | Patients undergoing cardiac surgery         | Moderate quality |
| Langlois, 2017 <sup>117</sup> | RCTs                                                         | PUFA                                | PUFA use                                         | No use                                 | 17 | Patients undergoing cardiac surgery         | High quality     |
| Chen, 2019 <sup>118</sup>     | RCTs, Prospective cohorts                                    | RAASi                               | RAASi use                                        | No use                                 | 11 | Patients undergoing cardiac surgery         | High quality     |
| Liu, 2014 <sup>119</sup>      | RCTs                                                         | Glucocorticoids                     | Use of different dose-schemes of glucocorticoids | No glucocorticoids                     | 19 | Patients undergoing cardiac surgery         | High quality     |
| Chen, 2020 <sup>120</sup>     | Prospective cohorts, Retrospective cohorts and Case controls | CHA2DS2-VASc                        | CHA2DS2-VASc $\geq 2$                            | CHA2DS2-VASc $< 2$                     | 8  | Patients undergoing cardiac surgery         | Moderate quality |
| Guan, 2020 <sup>121</sup>     | Prospective cohorts, Retrospective cohorts                   | off-pump CABG                       | off-pump CABG                                    | on-pump CABG                           | 13 | Patients with HF undergoing cardiac surgery | High quality     |

|                                    |                                            |                 |                                  |                                 |    |                                              |                        |
|------------------------------------|--------------------------------------------|-----------------|----------------------------------|---------------------------------|----|----------------------------------------------|------------------------|
| Liu, 2020 <sup>122</sup>           | Prospective cohorts, Retrospective cohorts | Postoperative   | High Neutrophil/Lymphocyte Ratio | Low Neutrophil/Lymphocyte Ratio | 12 | Patients undergoing cardiac surgery          | High quality           |
| Ruan, 2020 <sup>123</sup>          | RCTs                                       | Atrial pacing   | Atrial pacing                    | No atrial pacing                | 21 | Patients undergoing cardiac surgery          | High quality           |
| Yusuf Salmasi, 2020 <sup>124</sup> | Retrospective cohort                       | Mini-sternotomy | Mini-sternotomy                  | Right anterior thoracotomy      | 5  | Patients undergoing aortic valve replacement | Moderate quality       |
| Khan, 2020 <sup>125</sup>          | RCTs                                       | TAVR            | TAVR                             | SAVR                            | 5  | Patients undergoing aortic valve replacement | High quality           |
| Sun, 2020 <sup>126</sup>           | Retrospective cohort                       | RAASi           | RAASi use                        | No use                          | 2  | Patients undergoing TAVR                     | Moderate quality       |
| Angsubhakorn, 2020 <sup>127</sup>  | Retrospective cohorts                      | Transfemoral    | Transfemoral                     | No transfemoral                 | 7  | Patients undergoing TAVR                     | Critically low quality |
| Reynolds, 2021 <sup>128</sup>      | RCTs                                       | HTK             | HTK                              | multidose cardioplegia          | 4  | Patients undergoing cardiac surgery          | Moderate quality       |

AF: Atrial Fibrillation; BMI: Body mass index; CABG: coronary artery bypass graft; CHADS VASc: Congestive heart failure, Hypertension, Age>75 years, DHA: docosahexaenoic acid; Diabetes, Stroke, Vascular disease, Age>65, female Sex; BNP: B-natriuretic peptide; CPAP: continuous positive airway pressure; DC: direct current; EPA: eicosapentaenoic acid; GIK: glucose insulin potassium infusion; HF: heart failure; HTK: Histidine-Tryptophan-Ketoglutarate; NAC: N-acetylcysteine; NT-proBNP: N-terminal pro B-natriuretic peptide; PUFAs: Polyunsaturated fatty acids; RAASi: renin angiotensin aldosterone system

inhibitors OSAS: obstructive sleep apnea syndrome; RCT: randomized controlled trial; SAVR: surgical aorta valve replacement; TAVR: transcatheter aorta valve replacement

## Appendix 6 Non-significant risk/protective factors for postoperative AF, in meta-analyses of RCTs

eTable 1. Non-significant risk/protective factors for postoperative AF, in meta-analyses of RCTs

| Author, Year           | Predictor                                                                | Exposed/Unexposed as included in MA                                             | k  | n/N      | Metric | ES (95% CI)       | p     | PI include null value | I <sup>2</sup> % | SSE | ESB | LS sign | High RoB | GLE | AMSTAR 2 Quality |
|------------------------|--------------------------------------------------------------------------|---------------------------------------------------------------------------------|----|----------|--------|-------------------|-------|-----------------------|------------------|-----|-----|---------|----------|-----|------------------|
| Reynolds 2021          | HTK                                                                      | HTK or multidose cardioplegia                                                   | 4  | 76/363   | OR     | 1.18(0.39, 3.57)  | 0.768 | Yes                   | 74.23            | Yes | NP  | No      | >25%     | NS  | Moderate         |
| Ruan 2020              | left atrial pacing                                                       | left atrial pacing or not                                                       | 3  | 85/224   | OR     | 0.59(0.34, 1.02)  | 0.06  | Yes                   | 3.30             | No  | NP  | No      | ≤25%     | NS  | High             |
| Ruan 2020              | right atrial pacing                                                      | right atrial pacing or not                                                      | 8  | 191/764  | OR     | 0.76(0.49, 1.18)  | 0.225 | Yes                   | 24.70            | No  | No  | No      | ≤25%     | NS  | High             |
| Liu 2015               | High dose glucocorticoids                                                | High dose glucocorticoids or not                                                | 3  | 55/208   | RR     | 0.90(0.57, 1.42)  | 0.653 | Yes                   | 0.01             | No  | NP  | No      | >25%     | NS  | High             |
| Zhu 2018               | Dexmetomidine                                                            | Dexmetomidine or not                                                            | 5  | 56/698   | RR     | 0.70(0.26, 1.87)  | 0.481 | Yes                   | 55.14            | No  | No  | No      | >25%     | NS  | High             |
| Kaw 2016               | Diastolic dysfunction                                                    | Diastolic dysfunction or not                                                    | 3  | 195/733  | OR     | 2.67(0.45, 15.80) | 0.276 | Yes                   | 91.66            | No  | No  | No      | >25%     | NS  | Moderate         |
| Rabi 2010              | GI/GIK infusion                                                          | GI/GIK infusion or not                                                          | 12 | 688/1952 | OR     | 1.04(0.36, 2.98)  | 0.940 | Yes                   | 95.06            | No  | Yes | No      | >25%     | NS  | Critically low   |
| Liu 2015               | Anterior fat pad removal                                                 | Anterior fat pad removal or not                                                 | 7  | 216/991  | RR     | 1.41(0.85, 2.32)  | 0.180 | Yes                   | 70.38            | Yes | Yes | No      | >25%     | NS  | Moderate         |
| Ling 2018              | Sedation by Dexmetomidine                                                | Sedation by Dexmetomidine compared to propofol, morphin and placebo             | 9  | 251/1295 | OR     | 0.73(0.4, 1.33)   | 0.303 | Yes                   | 60.55            | No  | No  | No      | >25%     | NS  | High             |
| Ali-Hassan-Sayegh 2015 | GIK therapy                                                              | GIK therapy or not                                                              | 14 | 277/1799 | OR     | 0.72(0.48, 1.07)  | 0.108 | Yes                   | 56.20            | No  | Yes | No      | ≤25%     | NS  | High             |
| Espinosa 2016          | clevidipine                                                              | clevidipine or not                                                              | 4  | 74/1820  | RR     | 1(0.45, 2.25)     | 0.989 | Yes                   | 60.72            | No  | NP  | No      | ≤25%     | NS  | High             |
| Li 2020                | Glucose-Insulin-Potassium Therapy                                        | Glucose-Insulin-Potassium Therapy or not                                        | 13 | 203/1700 | RR     | 0.8(0.63, 1.02)   | 0.074 | Yes                   | 1.43             | Yes | No  | Yes     | >25%     | NS  | Moderate         |
| Gu 2012                | Epidural anaesthesia                                                     | Epidural anaesthesia or not                                                     | 5  | 155/540  | RR     | 0.57(0.27, 1.22)  | 0.149 | Yes                   | 83.03            | Yes | Yes | No      | >25%     | NS  | Critically low   |
| Hemila 2017            | Vitamin C use                                                            | Vitamin C use or not                                                            | 5  | 268/889  | RR     | 0.93(0.64, 1.35)  | 0.690 | Yes                   | 63.17            | Yes | No  | Yes     | ≤25%     | NS  | High             |
| Henyan 2005            | Intra-operative and postoperative initiation of magnesium administration | Intra-operative and postoperative initiation of magnesium administration or not | 4  | 133/528  | OR     | 1.02(0.68, 1.52)  | 0.942 | Yes                   | 1.38             | No  | NP  | No      | >25%     | NS  | Critically low   |

|              |                                                     |                                                            |    |          |    |                  |       |     |       |     |     |    |      |    |                |
|--------------|-----------------------------------------------------|------------------------------------------------------------|----|----------|----|------------------|-------|-----|-------|-----|-----|----|------|----|----------------|
| Henyan 2005  | Preoperative initiation of magnesium administration | Preoperative initiation of magnesium administration or not | 4  | 154/706  | OR | 0.38(0.14, 1.03) | 0.06  | Yes | 81.56 | Yes | No  | No | >25% | NS | Critically low |
| Mariani 2013 | n-3 PUFAs                                           | n-3 PUFAs use or not                                       | 8  | 859/2687 | RR | 0.83(0.64, 1.06) | 0.136 | Yes | 73.80 | Yes | Yes | No | >25% | NS | High           |
| Liu 2011     | Omega-3 fatty acids                                 | Omega-3 fatty acids use or not                             | 10 | 903/1955 | OR | 0.81(0.57, 1.15) | 0.240 | Yes | 64.68 | No  | No  | No | >25% | NS | Critically low |

Abbreviations: AF, Atrial Fibrillation; CE, class of evidence; CI, confidence interval; ES, effect size; ESB, excess significance bias; GIK, glucose insulin potassium infusion; GLE, GRADE level of evidence; GRADE: GRADE, Grading of Recommendations Assessment, Development and Evaluation; HTK, Histidine-Tryptophan-Ketoglutarate; I<sup>2</sup>, heterogeneity; K, number of studies for each factor; LS, largest study with significant effect; n, number of cases; N, total number of cohort per factor; NA, not assessable; NP, not pertinent, because the number of observed studies is less than the expected; NR, not reported; OR, odds ratio; PI, prediction interval; PUFAs: Polyunsaturated fatty acids; RoB, risk of bias; RR, risk ratio; SSE, small study effects; RCT, randomized controlled trial; vit, vitamin.



## References

1. Zhang CH, Huang DS, Shen D, et al. Association Between Serum Uric Acid Levels and Atrial Fibrillation Risk. *Cellular Physiology and Biochemistry* 2016;38(4):1589-95. doi: 10.1159/000443099
2. Disertori M, Quintarelli S. Renin-Angiotensin System and Atrial Fibrillation: Understanding the Connection. *J Atr Fibrillation* 2011;4(4):398. doi: 10.4022/jafib.398 [published Online First: 2011/12/20]
3. Schneider MP, Hua TA, Böhm M, et al. Prevention of Atrial Fibrillation by Renin-Angiotensin System Inhibition: A Meta-Analysis. *Journal of the American College of Cardiology* 2010;55(21):2299-307. doi: <https://doi.org/10.1016/j.jacc.2010.01.043>
4. Bhuriya R, Singh M, Molnar J, et al. Bisphosphonate use in women and the risk of atrial fibrillation: a systematic review and meta-analysis. *Int J Cardiol* 2010;142(3):213-7. doi: 10.1016/j.ijcard.2009.11.041 [published Online First: 2010/01/07]
5. White CM, Kluger J, Lertsburapa K, et al. Effect of preoperative angiotensin converting enzyme inhibitor or angiotensin receptor blocker use on the frequency of atrial fibrillation after cardiac surgery: a cohort study from the atrial fibrillation suppression trials II and III. *European Journal of Cardio-Thoracic Surgery* 2007;31(5):817-20. doi: 10.1016/j.ejcts.2007.02.010
6. Samokhvalov AV, Irving HM, Rehm J. Alcohol consumption as a risk factor for atrial fibrillation: a systematic review and meta-analysis. *European journal of cardiovascular prevention and rehabilitation : official journal of the European Society of Cardiology, Working Groups on Epidemiology & Prevention and Cardiac Rehabilitation and Exercise Physiology* 2010;17(6):706-12. doi: 10.1097/HJR.0b013e32833a1947
7. Kodama S, Saito K, Tanaka S, et al. Alcohol consumption and risk of atrial fibrillation: a meta-analysis. *J Am Coll Cardiol* 2011;57(4):427-36. doi: 10.1016/j.jacc.2010.08.641
8. Shiga T, Wajima Z, Inoue T, et al. Magnesium prophylaxis for arrhythmias after cardiac surgery: a meta-analysis of randomized controlled trials. *The American journal of medicine* 2004;117(5):325-33. doi: 10.1016/j.amjmed.2004.03.030 [published Online First: 2004/09/01]
9. Alghamdi AA, Al-Radi OO, Latter DA. Intravenous magnesium for prevention of atrial fibrillation after coronary artery bypass surgery: a systematic review and meta-analysis. *J Card Surg* 2005;20(3):293-9. doi: 10.1111/j.1540-8191.2005.200447.x [published Online First: 2005/04/28]
10. Mak A, Cheung MWL, Ho RC-M, et al. Bisphosphonates and atrial fibrillation: Bayesian meta-analyses of randomized controlled trials and observational studies. *BMC Musculoskeletal Disorders* 2009;10(1):113. doi: 10.1186/1471-2474-10-113
11. Leong DP, Caron F, Hillis C, et al. The risk of atrial fibrillation with ibrutinib use: a systematic review and meta-analysis. *Blood* 2016;128(1):138-40. doi: 10.1182/blood-2016-05-712828 [published Online First: 2016/06/02]
12. Tanboğa İH, Topçu S, Aksakal E, et al. The Risk of Atrial Fibrillation With Ivabradine Treatment: A Meta-analysis With Trial Sequential Analysis of More Than 40000 Patients. *Clinical Cardiology* 2016;39(10):615-20. doi: <https://doi.org/10.1002/clc.22578>
13. Liu T, Korantzopoulos P, Shao Q, et al. Mineralocorticoid receptor antagonists and atrial fibrillation: a meta-analysis. *Europace* 2016;18(5):672-8. doi: 10.1093/europace/euv366 [published Online First: 2015/12/26]
14. Shepherd J, Jones J, Frampton GK, et al. Intravenous magnesium sulphate and sotalol for prevention of atrial fibrillation after coronary artery bypass surgery: a systematic

- review and economic evaluation. *Health Technol Assess* 2008;12(28):iii-iv, ix-95. doi: 10.3310/hta12280 [published Online First: 2008/06/13]
15. Nomani H, Saei S, Johnston TP, et al. The Efficacy of Anti-inflammatory Agents in the Prevention of Atrial Fibrillation Recurrences. *Curr Med Chem* 2021;28(1):137-51. doi: 10.2174/1389450121666200302095103 [published Online First: 2020/03/03]
  16. Kontogiorgis C, Valikeserlis I, Hadjipavlou-Litina D, et al. Use of Non-Selective Non-Steroidal Anti-Inflammatory Drugs in Relation to Cardiovascular Events. A Systematic Pharmacoepidemiological Review. *Curr Vasc Pharmacol* 2016;14(6):502-13. doi: 10.2174/1570161114666160728093323 [published Online First: 2016/07/30]
  17. Madrid AH, Peng J, Zamora J, et al. The role of angiotensin receptor blockers and/or angiotensin converting enzyme inhibitors in the prevention of atrial fibrillation in patients with cardiovascular diseases: meta-analysis of randomized controlled clinical trials. *Pacing Clin Electrophysiol* 2004;27(10):1405-10. doi: 10.1111/j.1540-8159.2004.00645.x [published Online First: 2004/10/30]
  18. Yang Q, Qi X, Li Y. The preventive effect of atorvastatin on atrial fibrillation: a meta-analysis of randomized controlled trials. *BMC cardiovascular disorders* 2014;14(1):99. doi: 10.1186/1471-2261-14-99
  19. Patel AA, White CM, Gillespie EL, et al. Safety of amiodarone in the prevention of postoperative atrial fibrillation: a meta-analysis. *Am J Health Syst Pharm* 2006;63(9):829-37. doi: 10.2146/ajhp050454 [published Online First: 2006/04/28]
  20. Zhou X, Du JL, Yuan J, et al. Statin therapy is beneficial for the prevention of atrial fibrillation in patients with coronary artery disease: a meta-analysis. *Eur J Pharmacol* 2013;707(1-3):104-11. doi: 10.1016/j.ejphar.2013.03.012 [published Online First: 2013/03/26]
  21. Kulik A, Ruel M. Statins and coronary artery bypass graft surgery: preoperative and postoperative efficacy and safety. *Expert Opin Drug Saf* 2009;8(5):559-71. doi: 10.1517/14740330903188413 [published Online First: 2009/08/14]
  22. Winchester DE, Wen X, Xie L, et al. Evidence of pre-procedural statin therapy a meta-analysis of randomized trials. *J Am Coll Cardiol* 2010;56(14):1099-109. doi: 10.1016/j.jacc.2010.04.023 [published Online First: 2010/09/10]
  23. Dong L, Zhang F, Shu X. Usefulness of statins pretreatment for the prevention of postoperative atrial fibrillation in patients undergoing cardiac surgery. *Annals of medicine* 2011;43(1):69-74. doi: 10.3109/07853890.2010.541491 [published Online First: 2010/11/27]
  24. Liakopoulos OJ, Kuhn EW, Slottosch I, et al. Preoperative statin therapy for patients undergoing cardiac surgery. *Cochrane Database Syst Rev* 2012(4):Cd008493. doi: 10.1002/14651858.CD008493.pub2 [published Online First: 2012/04/20]
  25. Chen WT, Krishnan GM, Sood N, et al. Effect of statins on atrial fibrillation after cardiac surgery: a duration- and dose-response meta-analysis. *J Thorac Cardiovasc Surg* 2010;140(2):364-72. doi: 10.1016/j.jtcvs.2010.02.042 [published Online First: 2010/04/13]
  26. Liakopoulos OJ, Choi Y-H, Haldenwang PL, et al. Impact of preoperative statin therapy on adverse postoperative outcomes in patients undergoing cardiac surgery: a meta-analysis of over 30 000 patients. *European Heart Journal* 2008;29(12):1548-59. doi: 10.1093/eurheartj/ehn198
  27. Elgendy IY, Mahmoud A, Huo T, et al. Meta-analysis of 12 trials evaluating the effects of statins on decreasing atrial fibrillation after coronary artery bypass grafting. *Am J Cardiol* 2015;115(11):1523-8. doi: 10.1016/j.amjcard.2015.02.053 [published Online First: 2015/04/07]

28. Goh SL, Yap KH, Chua KC, et al. Does preoperative statin therapy prevent postoperative atrial fibrillation in patients undergoing cardiac surgery? *Interactive Cardiovascular and Thoracic Surgery* 2014;20(3):422-28. doi: 10.1093/icvts/ivu402
29. Rezaei Y, Gholami-Fesharaki M, Dehghani MR, et al. Statin Antiarrhythmic Effect on Atrial Fibrillation in Statin-Naive Patients Undergoing Cardiac Surgery: A Meta-Analysis of Randomized Controlled Trials. *J Cardiovasc Pharmacol Ther* 2016;21(2):167-76. doi: 10.1177/1074248415602557 [published Online First: 2015/09/04]
30. An J, Shi F, Liu S, et al. Preoperative statins as modifiers of cardiac and inflammatory outcomes following coronary artery bypass graft surgery: a meta-analysis. *Interactive Cardiovascular and Thoracic Surgery* 2017;25(6):958-65. doi: 10.1093/icvts/ivx172
31. Yuan X, Du J, Liu Q, et al. Defining the role of perioperative statin treatment in patients after cardiac surgery: A meta-analysis and systematic review of 20 randomized controlled trials. *Int J Cardiol* 2017;228:958-66. doi: 10.1016/j.ijcard.2016.11.116 [published Online First: 2016/12/04]
32. Zhen-Han L, Rui S, Dan C, et al. Perioperative statin administration with decreased risk of postoperative atrial fibrillation, but not acute kidney injury or myocardial infarction: A meta-analysis. *Scientific Reports* 2017;7(1):10091. doi: 10.1038/s41598-017-10600-x
33. Ma B, Sun J, Diao S, et al. Effects of perioperative statins on patient outcomes after noncardiac surgery: a meta-analysis. *Ann Med* 2018;50(5):402-09. doi: 10.1080/07853890.2018.1471217 [published Online First: 2018/05/10]
34. Zhang G, Wu Y. Circulating Galectin-3 and Atrial Fibrillation Recurrence after Catheter Ablation: A Meta-Analysis. *Cardiovasc Ther* 2019;2019:4148129. doi: 10.1155/2019/4148129 [published Online First: 2019/11/28]
35. Zhang BC, Che WL, Li WM, et al. Meta-analysis of P wave character as predictor of atrial fibrillation after coronary artery bypass grafting. *Int J Cardiol* 2011;152(2):260-2. doi: 10.1016/j.ijcard.2011.07.098 [published Online First: 2011/08/20]
36. Baker WL, White CM, Kluger J, et al. Effect of perioperative corticosteroid use on the incidence of postcardiothoracic surgery atrial fibrillation and length of stay. *Heart Rhythm* 2007;4(4):461-8. doi: 10.1016/j.hrthm.2006.11.026 [published Online First: 2007/04/03]
37. Whitlock RP, Dieleman JM, Belley-Cote E, et al. The Effect of Steroids in Patients Undergoing Cardiopulmonary Bypass: An Individual Patient Meta-Analysis of Two Randomized Trials. *J Cardiothorac Vasc Anesth* 2020;34(1):99-105. doi: 10.1053/j.jvca.2019.06.012 [published Online First: 2019/08/12]
38. Baker WL, Coleman CI. Meta-analysis of ascorbic acid for prevention of postoperative atrial fibrillation after cardiac surgery. *Am J Health Syst Pharm* 2016;73(24):2056-66. doi: 10.2146/ajhp160066 [published Online First: 2016/11/04]
39. Hill A, Clasen KC, Wendt S, et al. Effects of Vitamin C on Organ Function in Cardiac Surgery Patients: A Systematic Review and Meta-Analysis. *Nutrients* 2019;11(9) doi: 10.3390/nu11092103 [published Online First: 2019/09/07]
40. Polymeropoulos E, Bagos P, Papadimitriou M, et al. Vitamin C for the Prevention of Postoperative Atrial Fibrillation after Cardiac Surgery: A Meta-Analysis. *Adv Pharm Bull* 2016;6(2):243-50. doi: 10.15171/apb.2016.033 [published Online First: 2016/08/02]
41. Shi R, Li ZH, Chen D, et al. Sole and combined vitamin C supplementation can prevent postoperative atrial fibrillation after cardiac surgery: A systematic review and meta-analysis of randomized controlled trials. *Clin Cardiol* 2018;41(6):871-78. doi: 10.1002/clc.22951 [published Online First: 2018/04/01]

42. Bagshaw SM, Galbraith PD, Mitchell LB, et al. Prophylactic amiodarone for prevention of atrial fibrillation after cardiac surgery: a meta-analysis. *Ann Thorac Surg* 2006;82(5):1927-37. doi: 10.1016/j.athoracsur.2006.06.032 [published Online First: 2006/10/26]
43. Buckley MS, Nolan PE, Jr., Slack MK, et al. Amiodarone prophylaxis for atrial fibrillation after cardiac surgery: meta-analysis of dose response and timing of initiation. *Pharmacotherapy* 2007;27(3):360-8. doi: 10.1592/phco.27.3.360 [published Online First: 2007/02/24]
44. Sakamoto A, Hamasaki T, Kitakaze M. Perioperative landiolol administration reduces atrial fibrillation after cardiac surgery: A meta-analysis of randomized controlled trials. *Adv Ther* 2014;31(4):440-50. doi: 10.1007/s12325-014-0116-x [published Online First: 2014/04/24]
45. Ji T, Feng C, Sun L, et al. Are beta-blockers effective for preventing post-coronary artery bypass grafting atrial fibrillation? Direct and network meta-analyses. *Ir J Med Sci* 2016;185(2):503-11. doi: 10.1007/s11845-016-1447-1 [published Online First: 2016/04/17]
46. Kim SH, Jang MJ, Hwang HY. Perioperative Beta-Blocker for Atrial Fibrillation after Cardiac Surgery: A Meta-Analysis. *Thorac Cardiovasc Surg* 2021;69(2):133-40. doi: 10.1055/s-0040-1708472 [published Online First: 2020/04/07]
47. Thein PM, White K, Banker K, et al. Preoperative Use of Oral Beta-Adrenergic Blocking Agents and the Incidence of New-Onset Atrial Fibrillation After Cardiac Surgery. A Systematic Review and Meta-Analysis. *Heart Lung Circ* 2018;27(3):310-21. doi: 10.1016/j.hlc.2017.08.026 [published Online First: 2017/11/14]
48. Weymann A, Sabashnikov A, Ali-Hasan-Al-Saegh S, et al. Predictive Role of Coagulation, Fibrinolytic, and Endothelial Markers in Patients with Atrial Fibrillation, Stroke, and Thromboembolism: A Meta-Analysis, Meta-Regression, and Systematic Review. *Med Sci Monit Basic Res* 2017;23:97-140. doi: 10.12659/msmbr.902558 [published Online First: 2017/04/01]
49. Kuhn EW, Liakopoulos OJ, Stange S, et al. Preoperative statin therapy in cardiac surgery: a meta-analysis of 90 000 patients†. *European Journal of Cardio-Thoracic Surgery* 2013;45(1):17-26. doi: 10.1093/ejcts/ezt181
50. Cheng DC, Bainbridge D, Martin JE, et al. Does off-pump coronary artery bypass reduce mortality, morbidity, and resource utilization when compared with conventional coronary artery bypass? A meta-analysis of randomized trials. *Anesthesiology* 2005;102(1):188-203. doi: 10.1097/00000542-200501000-00028 [published Online First: 2004/12/25]
51. Wijesundera DN, Beattie WS, Djaiani G, et al. Off-pump coronary artery surgery for reducing mortality and morbidity: meta-analysis of randomized and observational studies. *J Am Coll Cardiol* 2005;46(5):872-82. doi: 10.1016/j.jacc.2005.05.064 [published Online First: 2005/09/06]
52. Zimmer J, Pezzullo J, Choucair W, et al. Meta-analysis of antiarrhythmic therapy in the prevention of postoperative atrial fibrillation and the effect on hospital length of stay, costs, cerebrovascular accidents, and mortality in patients undergoing cardiac surgery. *Am J Cardiol* 2003;91(9):1137-40. doi: 10.1016/s0002-9149(03)00168-1 [published Online First: 2003/04/26]
53. Sedrakyan A, Treasure T, Browne J, et al. Pharmacologic prophylaxis for postoperative atrial tachyarrhythmia in general thoracic surgery: evidence from randomized clinical trials. *J Thorac Cardiovasc Surg* 2005;129(5):997-1005. doi: 10.1016/j.jtcvs.2004.07.042 [published Online First: 2005/05/04]

54. Trivedi C, Upadhyay A, Solanki K. Efficacy of ranolazine in preventing atrial fibrillation following cardiac surgery: Results from a meta-analysis. *J Arrhythm* 2017;33(3):161-66. doi: 10.1016/j.joa.2016.10.563 [published Online First: 2017/06/14]
55. Khan MF, Wendel CS, Movahed MR. Prevention of Post-Coronary Artery Bypass Grafting (CABG) Atrial Fibrillation: Efficacy of Prophylactic Beta-Blockers in the Modern Era. *Annals of Noninvasive Electrocardiology* 2013;18(1):58-68. doi: <https://doi.org/10.1111/anec.12004>
56. Harling L, Rasoli S, Vecht JA, et al. Do antioxidant vitamins have an anti-arrhythmic effect following cardiac surgery? A meta-analysis of randomised controlled trials. *Heart* 2011;97(20):1636-42. doi: 10.1136/heartjnl-2011-300245 [published Online First: 2011/08/26]
57. Ali-Hassan-Sayegh S, Mirhosseini SJ, Rezaeisadrabadi M, et al. Antioxidant supplementations for prevention of atrial fibrillation after cardiac surgery: an updated comprehensive systematic review and meta-analysis of 23 randomized controlled trials. *Interact Cardiovasc Thorac Surg* 2014;18(5):646-54. doi: 10.1093/icvts/ivu020 [published Online First: 2014/02/22]
58. Lee JZ, Singh N, Howe CL, et al. Colchicine for Prevention of Post-Operative Atrial Fibrillation: A Meta-Analysis. *JACC: Clinical Electrophysiology* 2016;2(1):78-85. doi: <https://doi.org/10.1016/j.jacep.2015.09.016>
59. Salih M, Smer A, Charnigo R, et al. Colchicine for prevention of post-cardiac procedure atrial fibrillation: Meta-analysis of randomized controlled trials. *Int J Cardiol* 2017;243:258-62. doi: 10.1016/j.ijcard.2017.04.022 [published Online First: 2017/07/28]
60. Harrison RW, Hasselblad V, Mehta RH, et al. Effect of levosimendan on survival and adverse events after cardiac surgery: a meta-analysis. *J Cardiothorac Vasc Anesth* 2013;27(6):1224-32. doi: 10.1053/j.jvca.2013.03.027 [published Online First: 2013/09/21]
61. De Oliveira GS, Jr., Knautz JS, Sherwani S, et al. Systemic magnesium to reduce postoperative arrhythmias after coronary artery bypass graft surgery: a meta-analysis of randomized controlled trials. *J Cardiothorac Vasc Anesth* 2012;26(4):643-50. doi: 10.1053/j.jvca.2012.03.012 [published Online First: 2012/05/09]
62. Fairley JL, Zhang L, Glassford NJ, et al. Magnesium status and magnesium therapy in cardiac surgery: A systematic review and meta-analysis focusing on arrhythmia prevention. *J Crit Care* 2017;42:69-77. doi: 10.1016/j.jcrc.2017.05.038 [published Online First: 2017/07/09]
63. Athanasiou T, Aziz O, Mangoush O, et al. Does off-pump coronary artery bypass reduce the incidence of post-operative atrial fibrillation? A question revisited. *European Journal of Cardio-Thoracic Surgery* 2004;26(4):701-10. doi: 10.1016/j.ejcts.2004.05.053
64. Armaganijan L, Lopes RD, Healey JS, et al. Do omega-3 fatty acids prevent atrial fibrillation after open heart surgery? A meta-analysis of randomized controlled trials. *Clinics (Sao Paulo)* 2011;66(11):1923-8. doi: 10.1590/s1807-59322011001100012 [published Online First: 2011/11/17]
65. Benedetto U, Angeloni E, Melina G, et al. n-3 Polyunsaturated fatty acids for the prevention of postoperative atrial fibrillation: a meta-analysis of randomized controlled trials. *J Cardiovasc Med (Hagerstown)* 2013;14(2):104-9. doi: 10.2459/JCM.0b013e32834a13c1 [published Online First: 2011/08/10]
66. Costanzo S, di Niro V, Di Castelnuovo A, et al. Prevention of postoperative atrial fibrillation in open heart surgery patients by preoperative supplementation of n-3 polyunsaturated fatty acids: an updated meta-analysis. *J Thorac Cardiovasc Surg*

- 2013;146(4):906-11. doi: 10.1016/j.jtcvs.2013.03.015 [published Online First: 2013/04/17]
67. Mozaffarian D, Wu JH, de Oliveira Otto MC, et al. Fish oil and post-operative atrial fibrillation: a meta-analysis of randomized controlled trials. *J Am Coll Cardiol* 2013;61(21):2194-6. doi: 10.1016/j.jacc.2013.02.045 [published Online First: 2013/04/02]
68. Xin W, Wei W, Lin Z, et al. Fish oil and atrial fibrillation after cardiac surgery: a meta-analysis of randomized controlled trials. *PLoS One* 2013;8(9):e72913. doi: 10.1371/journal.pone.0072913 [published Online First: 2013/09/17]
69. Zhang B, Zhen Y, Tao A, et al. Polyunsaturated fatty acids for the prevention of atrial fibrillation after cardiac surgery: an updated meta-analysis of randomized controlled trials. *Journal of cardiology* 2014;63(1):53-9. doi: 10.1016/j.jcc.2013.06.014 [published Online First: 2013/08/06]
70. Wu F, Wu Y, Tao W, et al. Preoperative P-wave duration as a predictor of atrial fibrillation after coronary artery bypass grafting: A prospective cohort study with meta-analysis. *Int J Nurs Sci* 2018;5(2):151-56. doi: 10.1016/j.ijnss.2018.04.003 [published Online First: 2018/04/14]
71. de Frutos F, Gea A, Hernandez-Estefania R, et al. Prophylactic treatment with coenzyme Q10 in patients undergoing cardiac surgery: could an antioxidant reduce complications? A systematic review and meta-analysis. *Interactive Cardiovascular and Thoracic Surgery* 2014;20(2):254-59. doi: 10.1093/icvts/ivu334
72. Cappabianca G, Rotunno C, de Luca Tupputi Schinosa L, et al. Protective effects of steroids in cardiac surgery: a meta-analysis of randomized double-blind trials. *J Cardiothorac Vasc Anesth* 2011;25(1):156-65. doi: 10.1053/j.jvca.2010.03.015 [published Online First: 2010/06/12]
73. Viviano A, Kanagasabay R, Zakkar M. Is perioperative corticosteroid administration associated with a reduced incidence of postoperative atrial fibrillation in adult cardiac surgery? *Interactive Cardiovascular and Thoracic Surgery* 2013;18(2):225-29. doi: 10.1093/icvts/ivt486
74. Hu X, Yuan L, Wang H, et al. Efficacy and safety of vitamin C for atrial fibrillation after cardiac surgery: A meta-analysis with trial sequential analysis of randomized controlled trials. *Int J Surg* 2017;37:58-64. doi: 10.1016/j.ijsu.2016.12.009 [published Online First: 2016/12/14]
75. Burgess DC, Kilborn MJ, Keech AC. Interventions for prevention of post-operative atrial fibrillation and its complications after cardiac surgery: a meta-analysis. *Eur Heart J* 2006;27(23):2846-57. doi: 10.1093/eurheartj/ehl272 [published Online First: 2006/10/04]
76. Lowres N, Mulcahy G, Jin K, et al. Incidence of postoperative atrial fibrillation recurrence in patients discharged in sinus rhythm after cardiac surgery: a systematic review and meta-analysis†. *Interactive Cardiovascular and Thoracic Surgery* 2017;26(3):504-11. doi: 10.1093/icvts/ivx348
77. Öztürk S, Kayacioglu I, Sensoz Y, et al. Efficiency of Thyroid Function Test in the Prediction of Atrial Fibrillation Following Open Heart Surgery. *J Coll Physicians Surg Pak* 2020;30(7):740-44. doi: 10.29271/jcpsp.2020.07.740 [published Online First: 2020/08/20]
78. Walter E, Heringlake M. Cost-Effectiveness Analysis of Landiolol, an Ultrashort-Acting Beta-Blocker, for Prevention of Postoperative Atrial Fibrillation for the Germany Health Care System. *J Cardiothorac Vasc Anesth* 2020;34(4):888-97. doi: 10.1053/j.jvca.2019.11.003 [published Online First: 2019/12/16]
79. Bjerrum E, Wahlstroem KL, Gögenur I, et al. Postoperative atrial fibrillation following emergency noncardiothoracic surgery: A systematic review. *Eur J Anaesthesiol*

- 2020;37(8):671-79. doi: 10.1097/eja.0000000000001265 [published Online First: 2020/07/04]
80. Chokesuwattanaskul R, Thongprayoon C, Bathini T, et al. Incident atrial fibrillation in patients undergoing bariatric surgery: a systematic review and meta-analysis. *Intern Med J* 2020;50(7):810-17. doi: 10.1111/imj.14436 [published Online First: 2019/07/18]
81. Norhayati MN, Shaiful Bahari I, Zaharah S, et al. Metoprolol for prophylaxis of postoperative atrial fibrillation in cardiac surgery patients: systematic review and meta-analysis. *BMJ Open* 2020;10(10):e038364. doi: 10.1136/bmjopen-2020-038364 [published Online First: 2020/11/02]
82. Liu Y, Zhang L, Wang S, et al. Dexmedetomidine Reduces Atrial Fibrillation After Adult Cardiac Surgery: A Meta-Analysis of Randomized Controlled Trials. *Am J Cardiovasc Drugs* 2020;20(3):271-81. doi: 10.1007/s40256-019-00380-2 [published Online First: 2019/11/15]
83. Miller S, Crystal E, Garfinkle M, et al. Effects of magnesium on atrial fibrillation after cardiac surgery: a meta-analysis. *Heart* 2005;91(5):618-23. doi: 10.1136/hrt.2004.033811 [published Online First: 2005/04/16]
84. Henyan NN, Gillespie EL, White CM, et al. Impact of intravenous magnesium on post-cardiothoracic surgery atrial fibrillation and length of hospital stay: a meta-analysis. *Ann Thorac Surg* 2005;80(6):2402-6. doi: 10.1016/j.athoracsur.2005.03.036 [published Online First: 2005/11/25]
85. Guerra F, Romandini A, Barbarossa A, et al. Ranolazine for rhythm control in atrial fibrillation: A systematic review and meta-analysis. *Int J Cardiol* 2017;227:284-91. doi: 10.1016/j.ijcard.2016.11.103 [published Online First: 2016/11/15]
86. Patti G, Bennett R, Seshasai SRK, et al. Statin pretreatment and risk of in-hospital atrial fibrillation among patients undergoing cardiac surgery: a collaborative meta-analysis of 11 randomized controlled trials. *EP Europace* 2015;17(6):855-63. doi: 10.1093/europace/euv001
87. Putzu A, Capelli B, Belletti A, et al. Perioperative statin therapy in cardiac surgery: a meta-analysis of randomized controlled trials. *Critical care* 2016;20(1):395. doi: 10.1186/s13054-016-1560-6
88. Mariani J, Doval HC, Nul D, et al. N-3 Polyunsaturated Fatty Acids to Prevent Atrial Fibrillation: Updated Systematic Review and Meta-Analysis of Randomized Controlled Trials. *Journal of the American Heart Association* 2013;2(1):e005033. doi: 10.1161/JAHA.112.005033
89. Liu T, Korantzopoulos P, Shehata M, et al. Prevention of atrial fibrillation with omega-3 fatty acids: a meta-analysis of randomised clinical trials. *Heart* 2011;97(13):1034-40. doi: 10.1136/hrt.2010.215350 [published Online First: 2011/04/12]
90. Guo XY, Yan XL, Chen YW, et al. Omega-3 fatty acids for postoperative atrial fibrillation: alone or in combination with antioxidant vitamins? *Heart Lung Circ* 2014;23(8):743-50. doi: 10.1016/j.hlc.2014.02.018 [published Online First: 2014/04/02]
91. Gu W-J, Wei C-Y, Huang D-Q, et al. Meta-analysis of randomized controlled trials on the efficacy of thoracic epidural anesthesia in preventing atrial fibrillation after coronary artery bypass grafting. *BMC cardiovascular disorders* 2012;12(1):67. doi: 10.1186/1471-2261-12-67
92. Li Q, Yang J, Zhang J, et al. Effect of Perioperative Glucose-Insulin-Potassium Therapy in Patients Undergoing On-Pump Cardiac Surgery: A Meta-Analysis. *Heart Surg Forum* 2020;23(1):E063-e69. doi: 10.1532/hcf.2735 [published Online First: 2020/03/03]
93. Gillespie EL, Coleman CI, Sander S, et al. Effect of Prophylactic Amiodarone on Clinical and Economic Outcomes After Cardiothoracic Surgery: A Meta-Analysis. *Annals of Pharmacotherapy* 2005;39(9):1409-15. doi: 10.1345/aph.1E592

94. CHATTERJEE S, SARDAR P, MUKHERJEE D, et al. Timing and Route of Amiodarone for Prevention of Postoperative Atrial Fibrillation after Cardiac Surgery: A Network Regression Meta-analysis. *Pacing and Clinical Electrophysiology* 2013;36(8):1017-23. doi: <https://doi.org/10.1111/pace.12140>
95. Ali-Hassan-Sayegh S, Mirhosseini SJ, Zeriuoh M, et al. Safety and efficacy of glucose–insulin–potassium treatment in coronary artery bypass graft surgery and percutaneous coronary intervention. *Interactive CardioVascular and Thoracic Surgery* 2015;21(5):667-76. doi: 10.1093/icvts/ivv222
96. Espinosa A, Ripollés–Melchor J, Casans-Francés R, et al. Perioperative Use of Clevidipine: A Systematic Review and Meta-Analysis. *PLOS ONE* 2016;11(3):e0150625. doi: 10.1371/journal.pone.0150625
97. Violi F, Pastori D, Pignatelli P, et al. Antioxidants for prevention of atrial fibrillation: a potentially useful future therapeutic approach? A review of the literature and meta-analysis. *EP Europace* 2014;16(8):1107-16. doi: 10.1093/europace/euu040
98. Ling X, Zhou H, Ni Y, et al. Does dexmedetomidine have an antiarrhythmic effect on cardiac patients? A meta-analysis of randomized controlled trials. *PLOS ONE* 2018;13(3):e0193303. doi: 10.1371/journal.pone.0193303
99. DiNicolantonio JJ, Beavers CJ, Menezes AR, et al. Meta-analysis comparing carvedilol versus metoprolol for the prevention of postoperative atrial fibrillation following coronary artery bypass grafting. *Am J Cardiol* 2014;113(3):565-9. doi: 10.1016/j.amjcard.2013.10.020 [published Online First: 2013/12/18]
100. Li L, Ai Q, Lin L, et al. Efficacy and safety of landiolol for prevention of atrial fibrillation after cardiac surgery: a meta-analysis of randomized controlled trials. *Int J Clin Exp Med* 2015;8(7):10265-73.
101. Ho KM, Tan JA. Benefits and Risks of Corticosteroid Prophylaxis in Adult Cardiac Surgery. *Circulation* 2009;119(14):1853-66. doi: 10.1161/CIRCULATIONAHA.108.848218
102. Athanasiou T, Aziz O, Mangoush O, et al. Do off-pump techniques reduce the incidence of postoperative atrial fibrillation in elderly patients undergoing coronary artery bypass grafting? *Ann Thorac Surg* 2004;77(5):1567-74. doi: 10.1016/j.athoracsur.2003.10.040 [published Online First: 2004/04/28]
103. Wiesbauer F, Schlager O, Domanovits H, et al. Perioperative  $\beta$ -Blockers for Preventing Surgery-Related Mortality and Morbidity: A Systematic Review and Meta-Analysis. *Anesthesia & Analgesia* 2007;104(1):27-41. doi: 10.1213/01.ane.0000247805.00342.21
104. Litton E, Ho KM. The use of pre-operative brain natriuretic peptides as a predictor of adverse outcomes after cardiac surgery: a systematic review and meta-analysis. *European Journal of Cardio-Thoracic Surgery* 2011;41(3):525-34. doi: 10.1093/ejcts/ezr007
105. Phan K, Khuong JN, Xu J, et al. Obesity and postoperative atrial fibrillation in patients undergoing cardiac surgery: Systematic review and meta-analysis. *Int J Cardiol* 2016;217:49-57. doi: 10.1016/j.ijcard.2016.05.002 [published Online First: 2016/05/15]
106. Liu S, Li Z, Liu Z, et al. Blood transfusion and risk of atrial fibrillation after coronary artery bypass graft surgery: A meta-analysis of cohort studies. *Medicine (Baltimore)* 2018;97(10):e9700. doi: 10.1097/md.00000000000009700 [published Online First: 2018/03/09]
107. Rabi D, Clement F, McAlister F, et al. Effect of perioperative glucose-insulin-potassium infusions on mortality and atrial fibrillation after coronary artery bypass grafting: a systematic review and meta-analysis. *Can J Cardiol* 2010;26(6):178-84. doi: 10.1016/s0828-282x(10)70394-9 [published Online First: 2010/06/16]



108. LIU S, JING Y, ZHANG J, et al. Does Anterior Fat Pad Removal Reduce the Incidence of Atrial Fibrillation after CABG? A Meta-Analysis of Randomized Controlled Trials. *Pacing and Clinical Electrophysiology* 2015;38(11):1363-68. doi: <https://doi.org/10.1111/pace.12740>
109. Geng J, Qian J, Si W, et al. The clinical benefits of perioperative antioxidant vitamin therapy in patients undergoing cardiac surgery: a meta-analysis. *Interactive Cardiovascular and Thoracic Surgery* 2017;25(6):966-74. doi: 10.1093/icvts/ivx178
110. Lennerz C, Barman M, Tantawy M, et al. Colchicine for primary prevention of atrial fibrillation after open-heart surgery: Systematic review and meta-analysis. *Int J Cardiol* 2017;249:127-37. doi: 10.1016/j.ijcard.2017.08.039 [published Online First: 2017/09/19]
111. Zhu Z, Zhou H, Ni Y, et al. Can dexmedetomidine reduce atrial fibrillation after cardiac surgery? A systematic review and meta-analysis. *Drug Des Devel Ther* 2018;12:521-31. doi: 10.2147/dddt.S153834 [published Online First: 2018/03/22]
112. Kaw R, Hernandez AV, Pasupuleti V, et al. Effect of diastolic dysfunction on postoperative outcomes after cardiovascular surgery: A systematic review and meta-analysis. *The Journal of Thoracic and Cardiovascular Surgery* 2016;152(4):1142-53. doi: <https://doi.org/10.1016/j.jtcvs.2016.05.057>
113. Liu X-H, Xu C-Y, Fan G-H. Efficacy of N-acetylcysteine in preventing atrial fibrillation after cardiac surgery: a meta-analysis of published randomized controlled trials. *BMC cardiovascular disorders* 2014;14(1):52. doi: 10.1186/1471-2261-14-52
114. Qaddoura A, Kabali C, Drew D, et al. Obstructive sleep apnea as a predictor of atrial fibrillation after coronary artery bypass grafting: a systematic review and meta-analysis. *Can J Cardiol* 2014;30(12):1516-22. doi: 10.1016/j.cjca.2014.10.014 [published Online First: 2014/12/06]
115. Hu XL, Chen Y, Zhou ZD, et al. Posterior pericardiotomy for the prevention of atrial fibrillation after coronary artery bypass grafting: A meta-analysis of randomized controlled trials. *Int J Cardiol* 2016;215:252-6. doi: 10.1016/j.ijcard.2016.04.081 [published Online First: 2016/04/30]
116. Zhou A-G, Wang X-X, Pan D-B, et al. Preoperative Antihypertensive Medication in Relation to Postoperative Atrial Fibrillation in Patients Undergoing Cardiac Surgery: A Meta-Analysis. *BioMed Research International* 2017;2017:1203538. doi: 10.1155/2017/1203538
117. Langlois PL, Hardy G, Manzanares W. Omega-3 polyunsaturated fatty acids in cardiac surgery patients: An updated systematic review and meta-analysis. *Clinical Nutrition* 2017;36(3):737-46. doi: <https://doi.org/10.1016/j.clnu.2016.05.013>
118. Chen S, Acou W-J, Kiuchi MG, et al. Association of Preoperative Renin-Angiotensin System Inhibitors With Prevention of Postoperative Atrial Fibrillation and Adverse Events: A Systematic Review and Meta-analysis. *JAMA Network Open* 2019;2(5):e194934-e34. doi: 10.1001/jamanetworkopen.2019.4934
119. Liu C, Wang J, Yiu D, et al. The Efficacy of Glucocorticoids for the Prevention of Atrial Fibrillation, or Length of Intensive Care Unit or Hospital Stay After Cardiac Surgery: A Meta-Analysis. *Cardiovascular Therapeutics* 2014;32(3):89-96. doi: <https://doi.org/10.1111/1755-5922.12062>
120. Chen YL, Zeng M, Liu Y, et al. CHA(2)DS(2)-VASc Score for Identifying Patients at High Risk of Postoperative Atrial Fibrillation After Cardiac Surgery: A Meta-analysis. *Ann Thorac Surg* 2020;109(4):1210-16. doi: 10.1016/j.athoracsur.2019.07.084 [published Online First: 2019/09/16]
121. Guan Z, Guan X, Gu K, et al. Short-term outcomes of on- vs off-pump coronary artery bypass grafting in patients with left ventricular dysfunction: a systematic review and

- meta-analysis. *Journal of Cardiothoracic Surgery* 2020;15(1):84. doi: 10.1186/s13019-020-01115-0
122. Liu Z, Nguyen Khuong J, Borg Caruana C, et al. The Prognostic Value of Elevated Perioperative Neutrophil-Lymphocyte Ratio in Predicting Postoperative Atrial Fibrillation After Cardiac Surgery: A Systematic Review and Meta-Analysis. *Heart Lung Circ* 2020;29(7):1015-24. doi: 10.1016/j.hlc.2019.11.021 [published Online First: 2020/02/25]
123. Ruan Y, Robinson NB, Naik A, et al. Effect of atrial pacing on post-operative atrial fibrillation following coronary artery bypass grafting: Pairwise and network meta-analyses. *Int J Cardiol* 2020;302:103-07. doi: 10.1016/j.ijcard.2019.12.009 [published Online First: 2019/12/16]
124. Yousuf Salmasi M, Hamilton H, Rahman I, et al. Mini-sternotomy vs right anterior thoracotomy for aortic valve replacement. *Journal of Cardiac Surgery* 2020;35(7):1570-82. doi: <https://doi.org/10.1111/jocs.14607>
125. Khan MR, Kayani WT, Manan M, et al. Comparison of surgical versus transcatheter aortic valve replacement for patients with aortic stenosis at low-intermediate risk. *Cardiovascular Diagnosis and Therapy* 2020;10(2):135-44.
126. Sun Y, Li J, Li G, et al. Impact of renin-angiotensin system inhibitors on outcomes after transcatheter aortic valve replacement: A meta-analysis. *Catheter Cardiovasc Interv* 2021;97(1):E88-e94. doi: 10.1002/ccd.28899 [published Online First: 2020/04/21]
127. Angsubhakorn N, Kittipibul V, Prasitlumkum N, et al. Non-Transfemoral Transcatheter Aortic Valve Replacement Approach is Associated with a Higher Risk of New-Onset Atrial Fibrillation: A Systematic Review and Meta-Analysis. *Heart Lung Circ* 2020;29(5):748-58. doi: 10.1016/j.hlc.2019.06.716 [published Online First: 2019/07/07]
128. Reynolds AC, Asopa S, Modi A, et al. HTK versus multidose cardioplegias for myocardial protection in adult cardiac surgery: A meta-analysis. *Journal of Cardiac Surgery* 2021;36(4):1334-43. doi: <https://doi.org/10.1111/jocs.15397>
